# Supplementary material for: Mechanism of piR-DQ590027/MIR17HG regulating the permeability of glioma conditioned normal BBB
Source: Springer Nature journal article supplement (doi:10.1186/s13046-018-0886-0), 2018-10-11

## **Additional file**

### **Title: Mechanism of piR-DQ590027/MIR17HG Regulation of Permeability across the glioma conditioned normal BBB**

#### ***Additional file Summary***

##### **-- Figure Legends**

##### **- Figures**

**Figure.S1** The permeability of glioma-conditioned normal BBB was increased. “ECs” represents co-cultured ECs (hCMEC/D3) with human astrocytes; “GECs” represents co-cultured ECs (hCMEC/D3) with glioma cells. (A) TEER values in the *in vitro* glioma-conditioned normal BBB model. Data represent the mean  $\pm$  SD ( $n = 5$ , each).  $*P < 0.05$  vs. the ECs group. (B) HRP flux in the *in vitro* glioma-conditioned normal BBB model. Data represent the mean  $\pm$  SD ( $n=5$ , each).  $*P<0.05$  vs. the ECs group.

**Figure.S2** The prediction results of Bioinformatics software. (A) The predicted binding site for piR-DQ590027 in the base sequence of MIR17HG. (B) The predicted binding sites of MIR17HG and miR-153/miR-377. (C) The predicted binding sites of miR-153 and miR-377 in 3'UTR of FOXR2. (D) The predicted binding sites of FOXR2 and the promoter regions of ZO-1, claudin-5 and occludin respectively (“yellow” represents the binding sites; “red” represents transcription start site).

**Figure.S3** The schematic cartoon underlying the mechanism of piR-DQ590027 /MIR17HG regulating the permeability of glioma conditioned normal BBB.



Figure S3

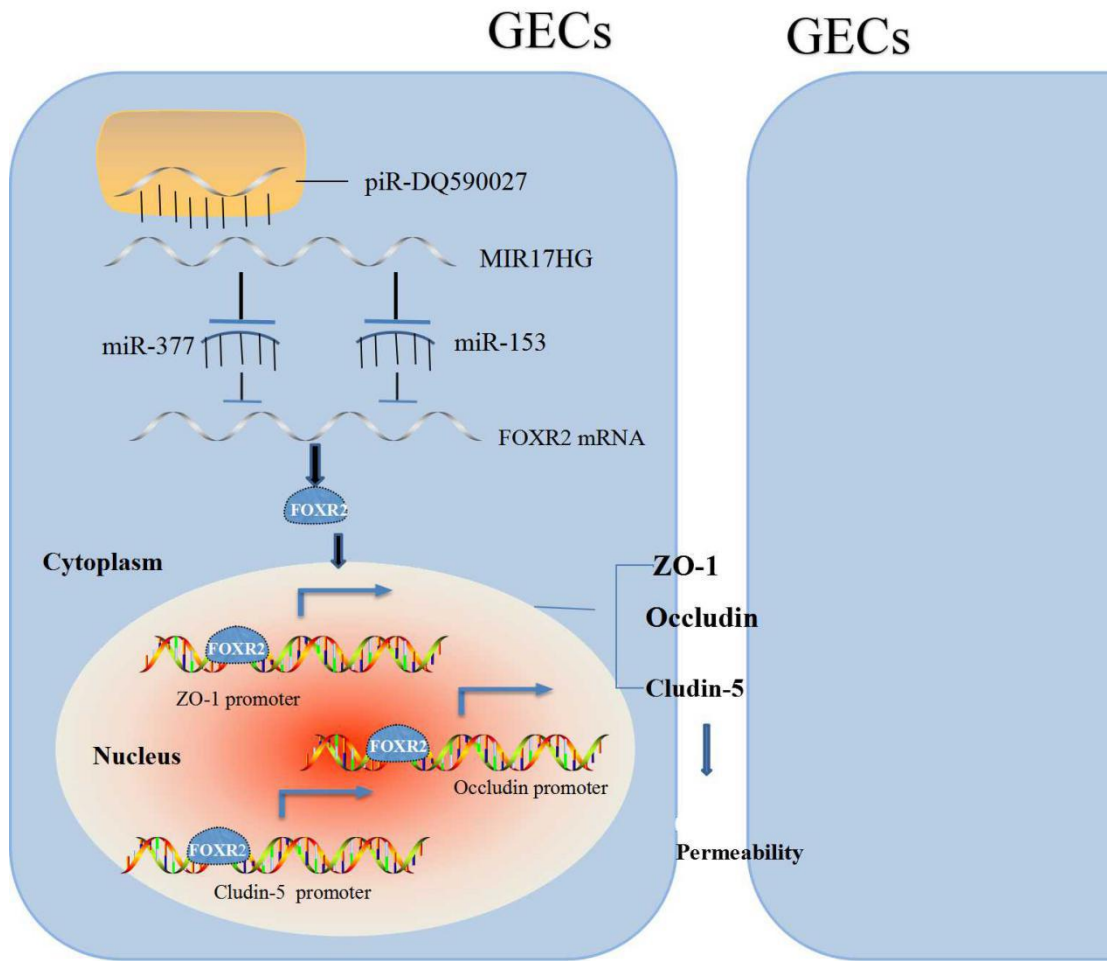

Supplement: MOESM1 [file 16192020]
